# Supplementary material
Source: PubMed Central journal article supplement (PMC8194319)

Figure 1: Selection of applicants for inclusion in analysis.

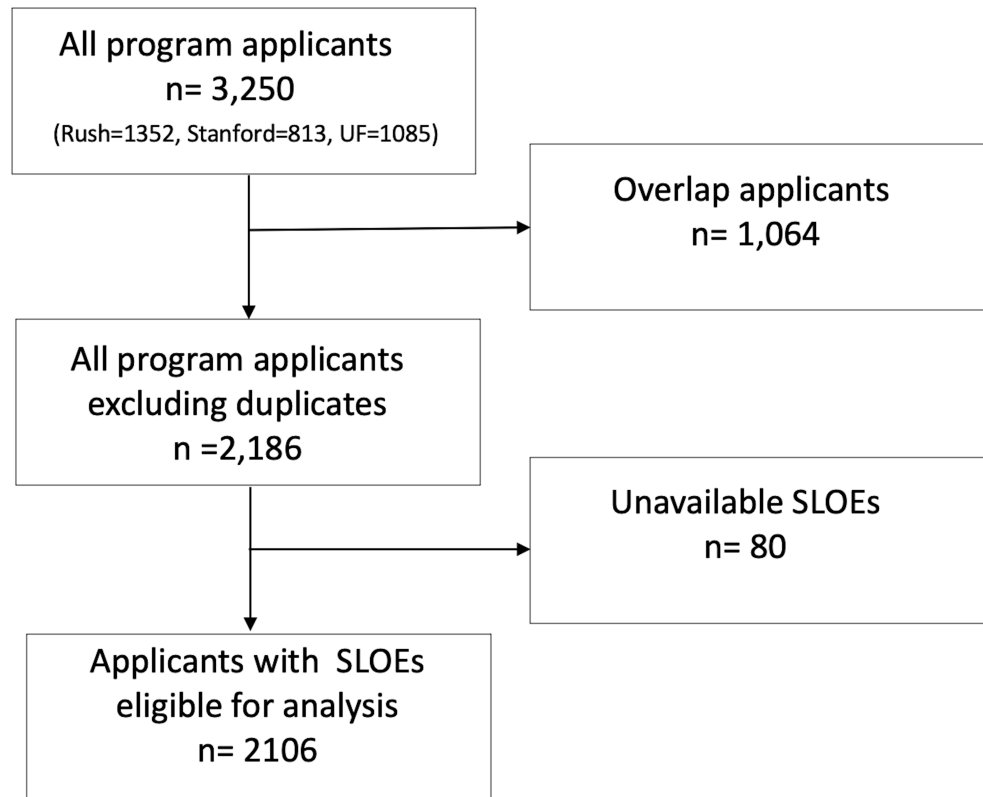

Supplement: AET2-5-e10607-s001.pdf [file AET2-5-e10607-s001.pdf]
